# Supplementary material for: Developing and evaluating a Bayesian weather generator for UK precipitation conditioned on discrete storm types
Source: Copernicus journal article supplement (doi:10.5194/egusphere-2025-4110), 2025-09-01
Supplement: Supplementary file 1 [file egusphere-2025-4110-supplement.pdf]

Supplement to:  
Developing and evaluating a Bayesian weather  
generator for UK precipitation conditioned on  
discrete storm types

Paul Bell<sup>1</sup>, Jennifer Catto<sup>1</sup>, Anne Jones<sup>2</sup>, and Stefan Siebert<sup>1</sup>

<sup>1</sup>University of Exeter, Exeter, United Kingdom

<sup>2</sup>IBM Research Europe, The Hartree Centre STFC Laboratory,  
Sci-Tech Daresbury, Warrington, WA4 4AD, United Kingdom

August 26, 2025

## **S1 Posterior predictive distribution**

Figures S1, S2 and S3 show the posterior predictive draws (for precipitation greater than  $1 \text{ mm } 6\text{h}^{-1}$ ) for all the models. This corresponds with Figure 10 in the main manuscript which only shows the Atmospheric model.

## **S2 Prior predictive plots for all stations**

Figures S4–S21 show the plots used to investigate the prior predictive distribution, for all models and stations, for the chosen prior distributions. These figures correspond with Figures 4 and 5 in the main manuscript which just shows the Wattisham Atmospheric model.

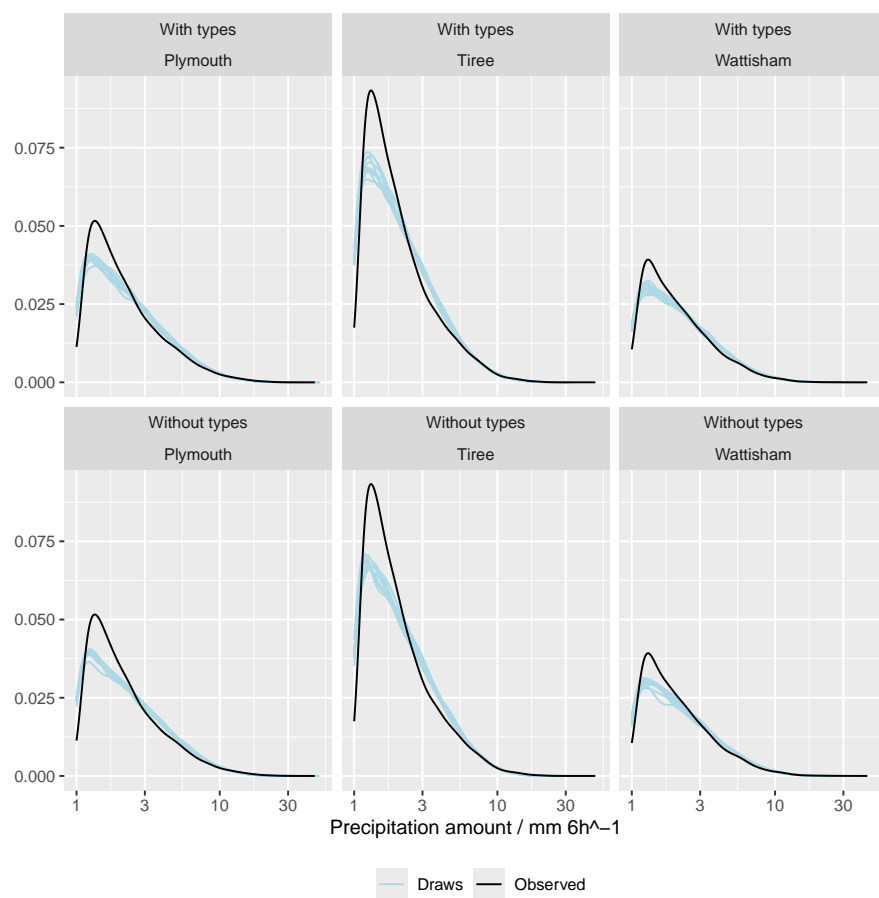

Figure S1: Posterior predictive checks for the Null model

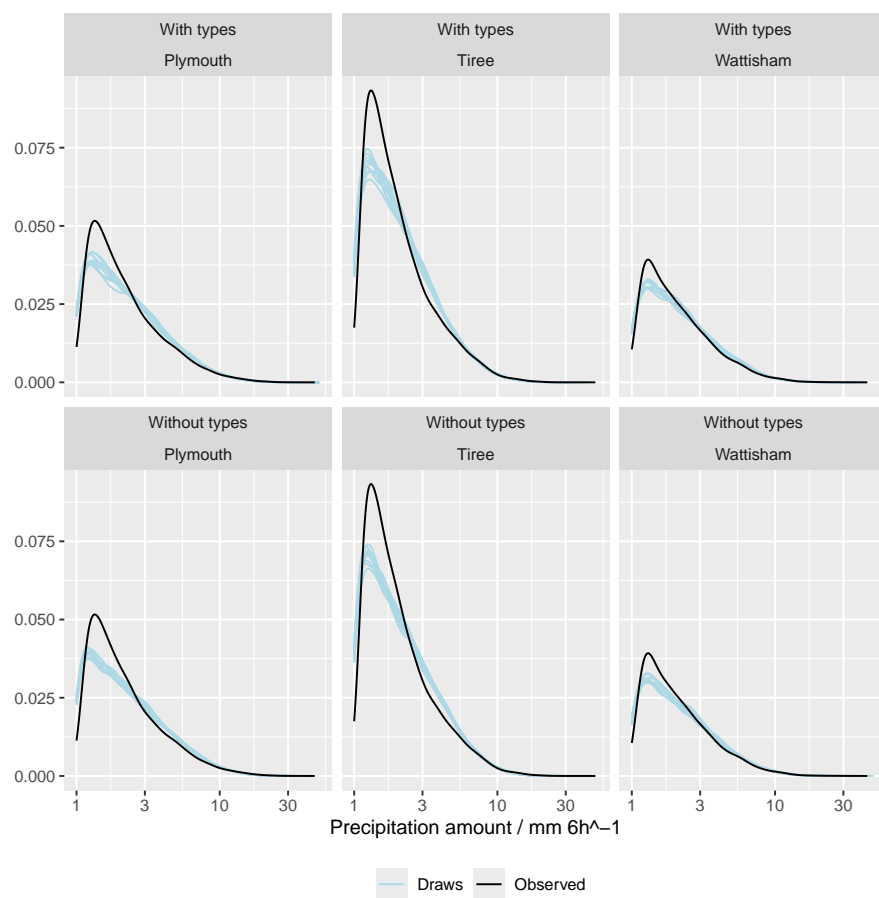

Figure S2: Posterior predictive checks for the Seasonal model

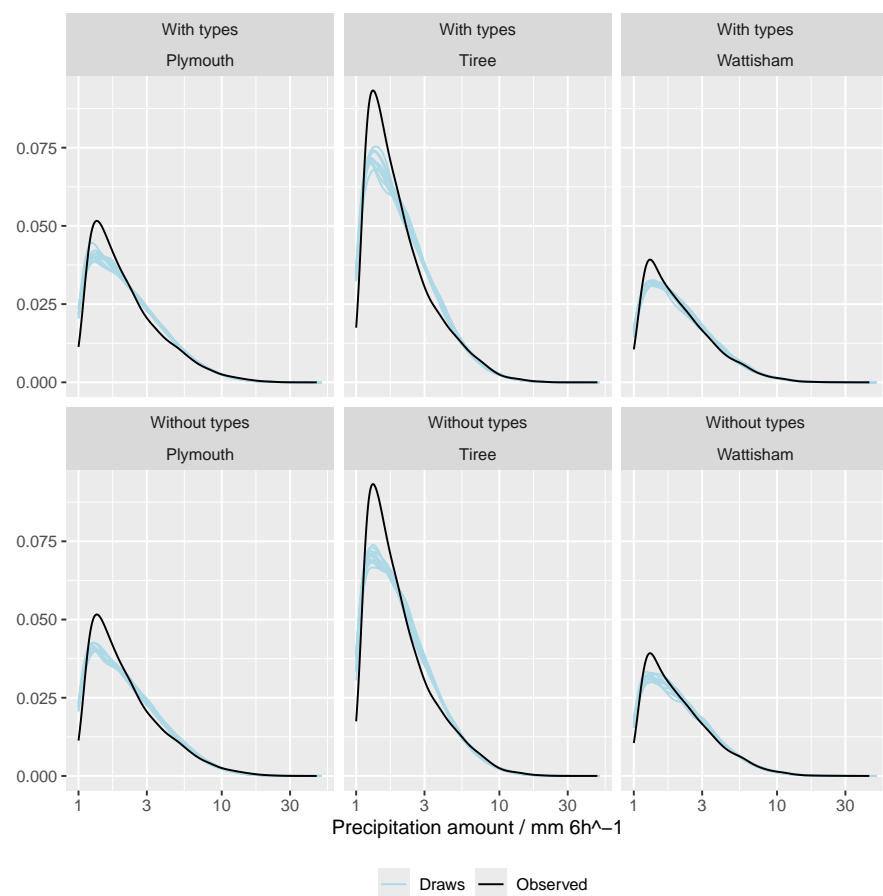

Figure S3: Posterior predictive checks for the Atmospheric model

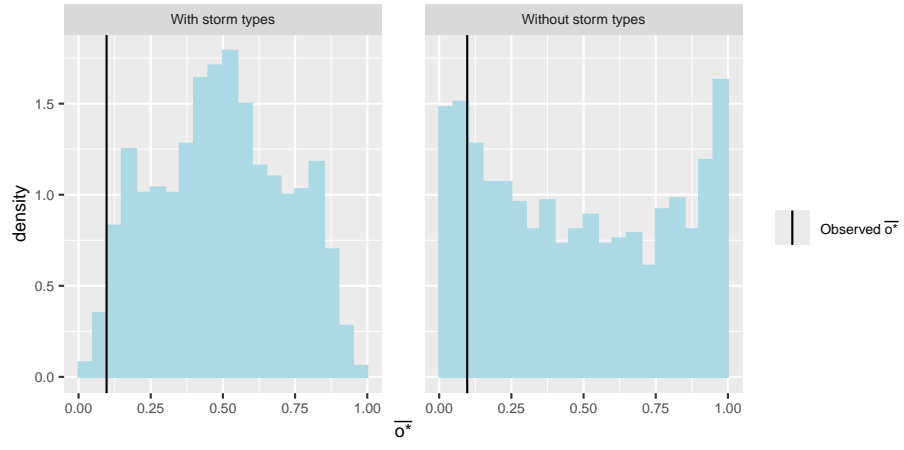

Figure S4: Prior predictive plot for the Null occurrence model for Wattisham.

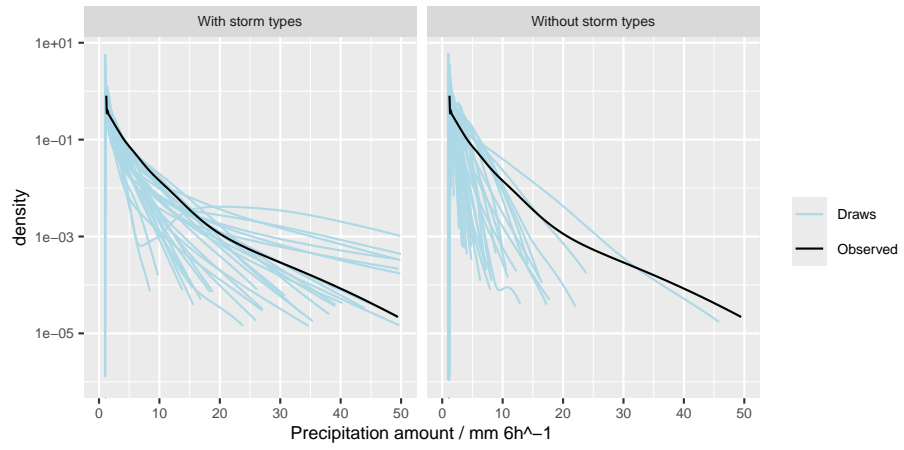

Figure S5: Prior predictive plot for the Null amounts model for Wattisham.

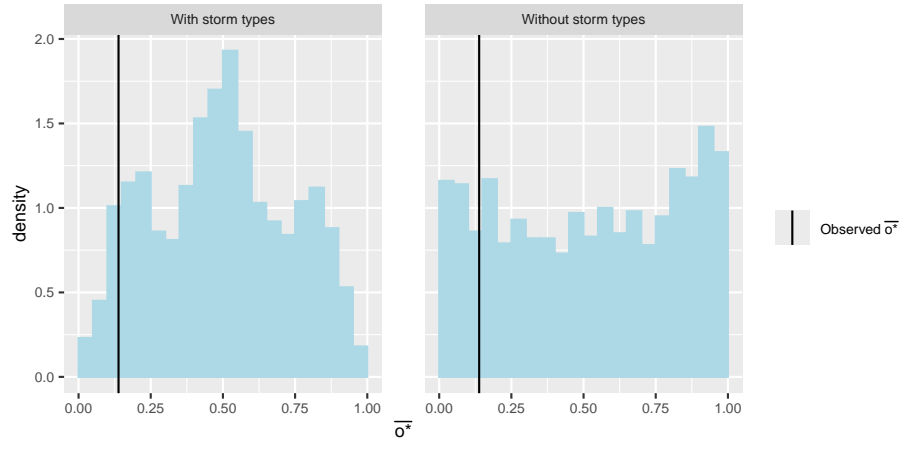

Figure S6: Prior predictive plot for the Null occurrence model for Plymouth.

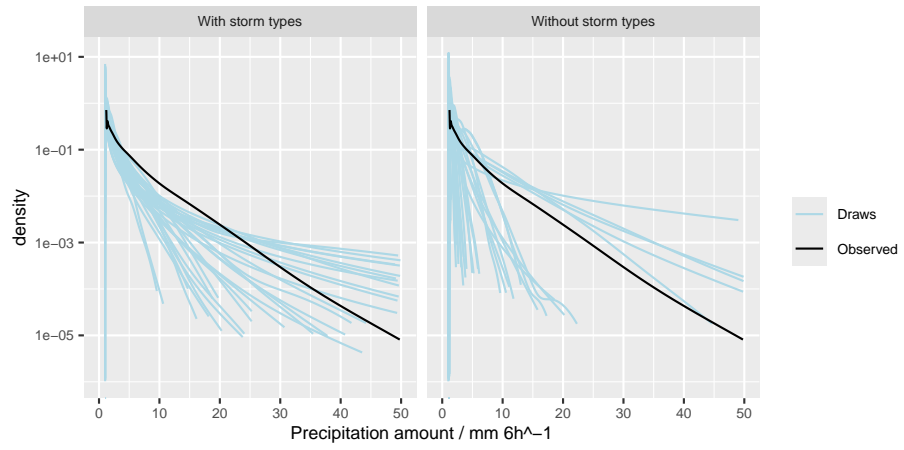

Figure S7: Prior predictive plot for the Null amounts model for Plymouth.

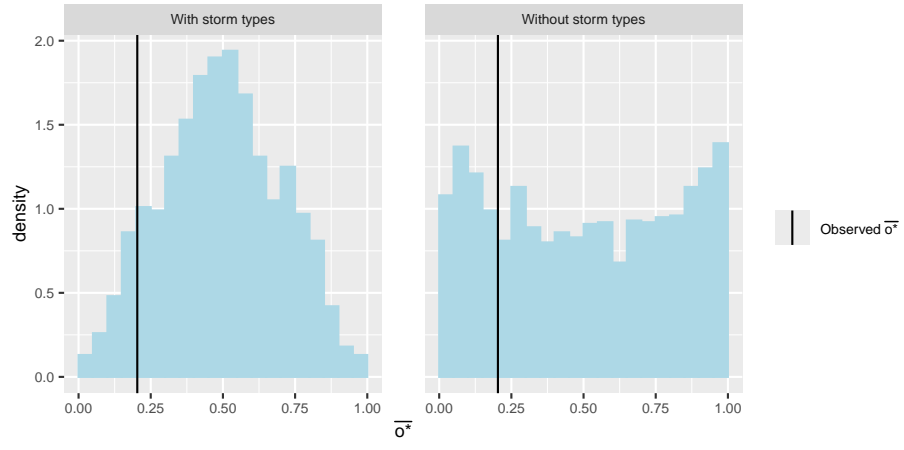

Figure S8: Prior predictive plot for the Null occurrence model for Tiree.

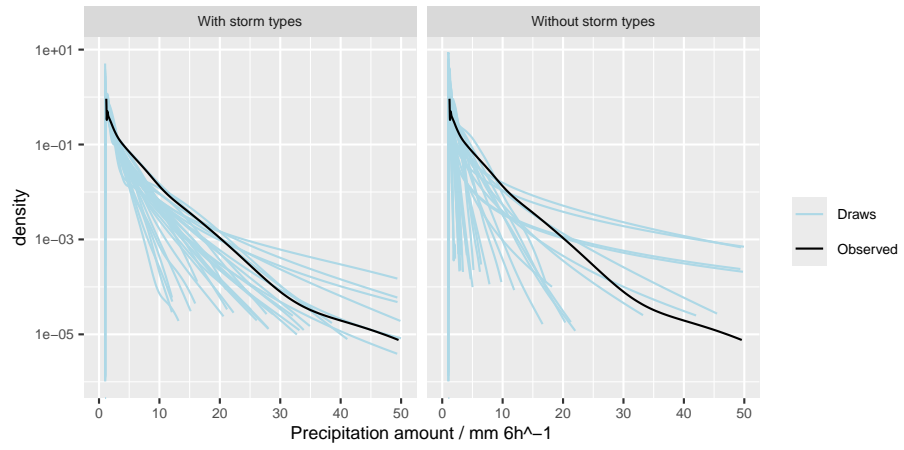

Figure S9: Prior predictive plot for the Null amounts model for Tiree.

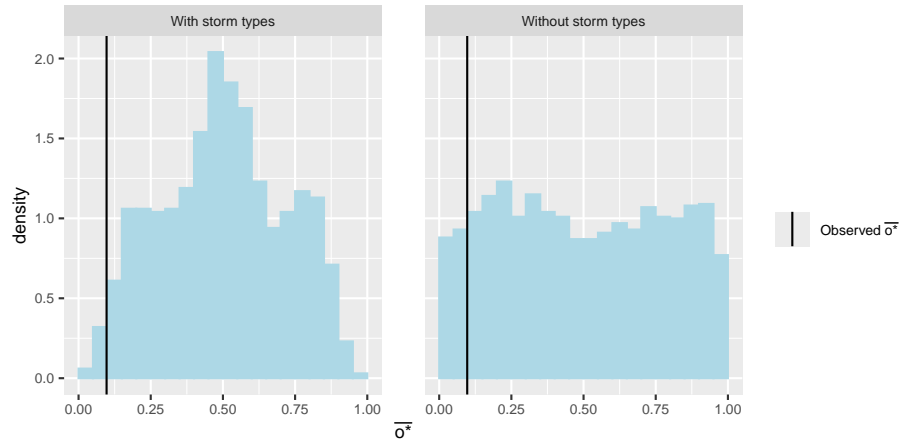

Figure S10: Prior predictive plot for the Seasonal occurrence model for Wattisham.

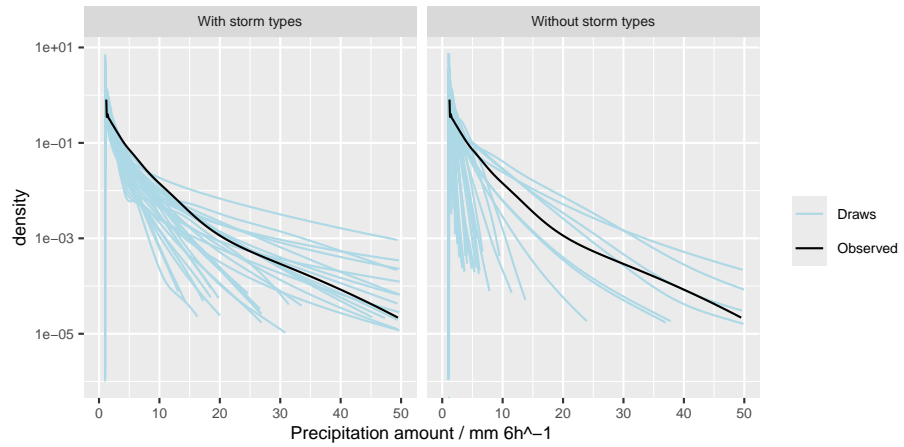

Figure S11: Prior predictive plot for the Seasonal amounts model for Wattisham.



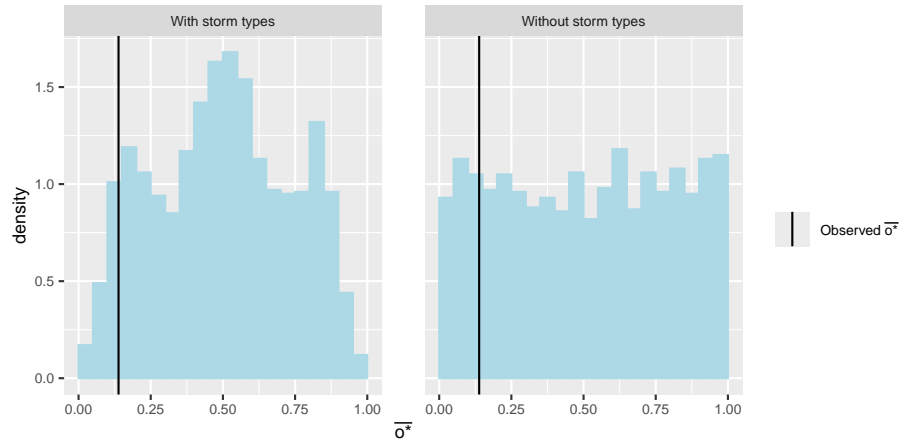

Figure S12: Prior predictive plot for the Seasonal occurrence model for Plymouth.

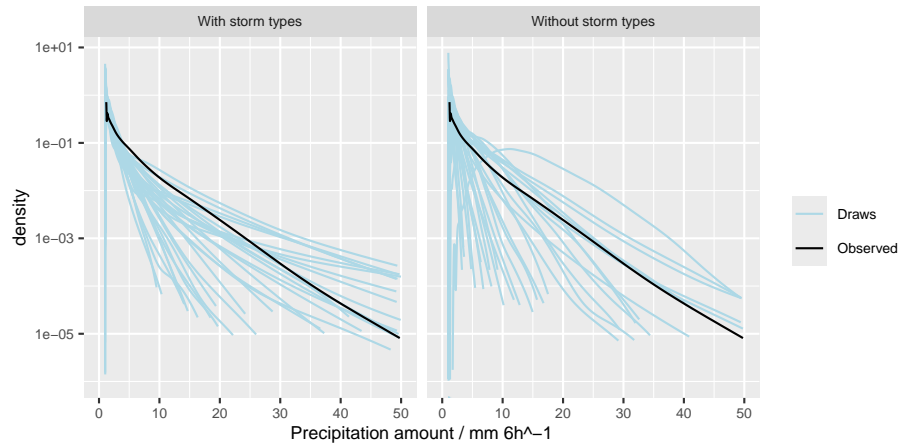

Figure S13: Prior predictive plot for the Seasonal amounts model for Plymouth.

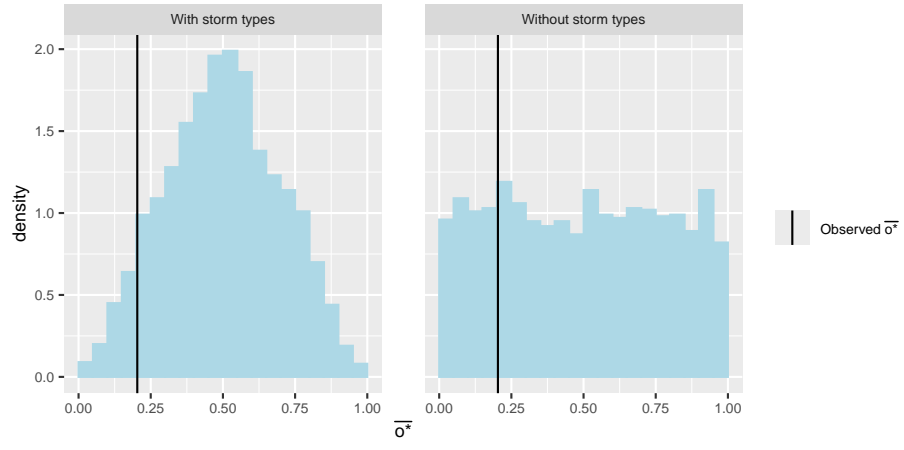

Figure S14: Prior predictive plot for the Seasonal occurrence model for Tiree.

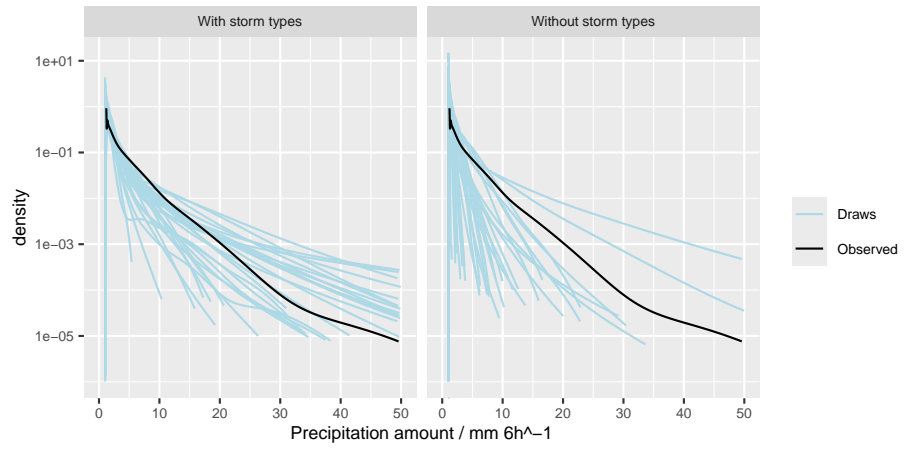

Figure S15: Prior predictive plot for the Seasonal amounts model for Tiree.

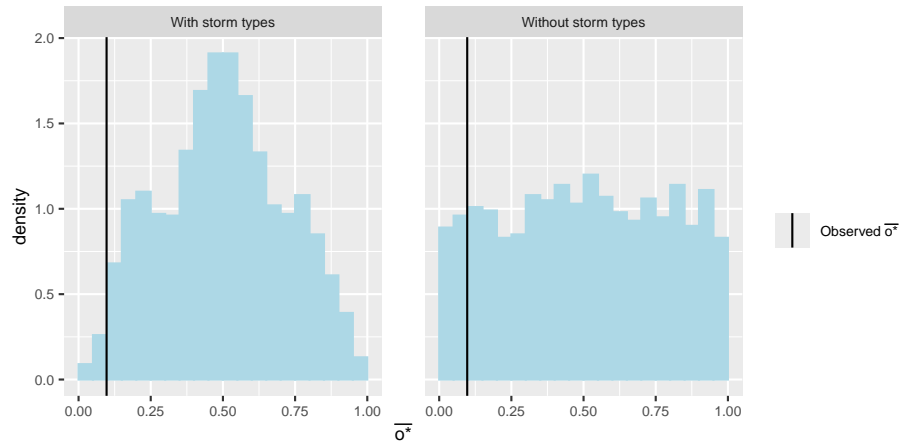

Figure S16: Prior predictive plot for the Atmospheric occurrence model for Wattisham.

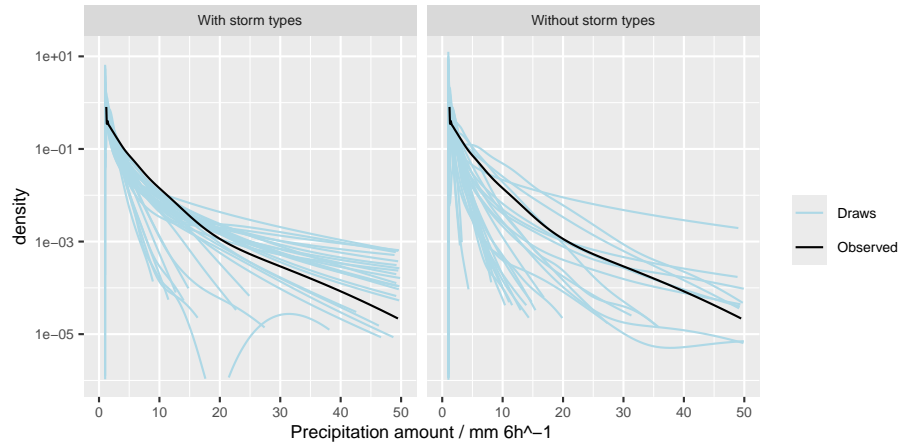

Figure S17: Prior predictive plot for the Atmospheric amounts model for Wattisham.

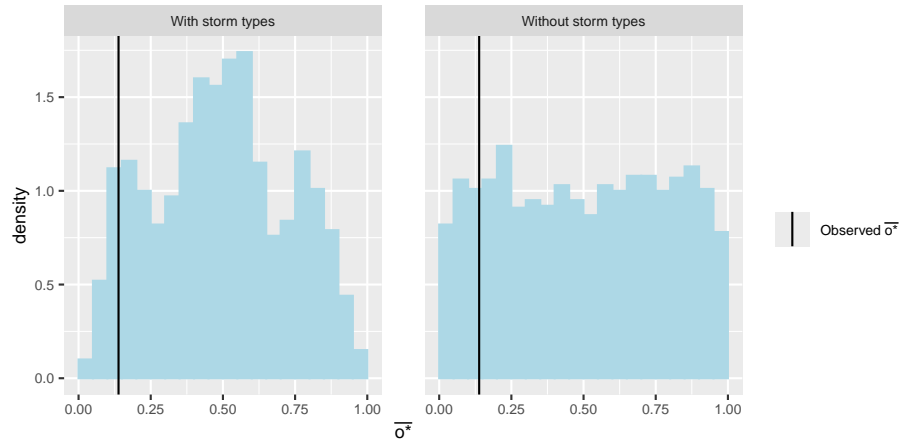

Figure S18: Prior predictive plot for the Atmospheric occurrence model for Plymouth.

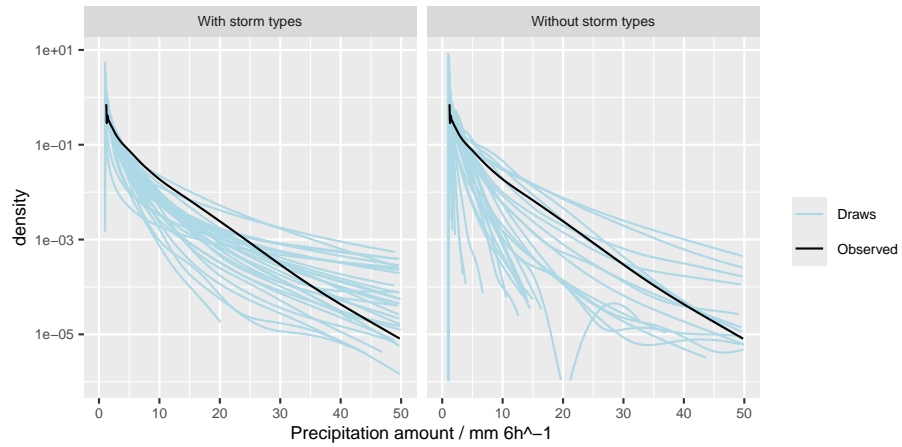

Figure S19: Prior predictive plot for the Atmospheric amounts model for Plymouth.

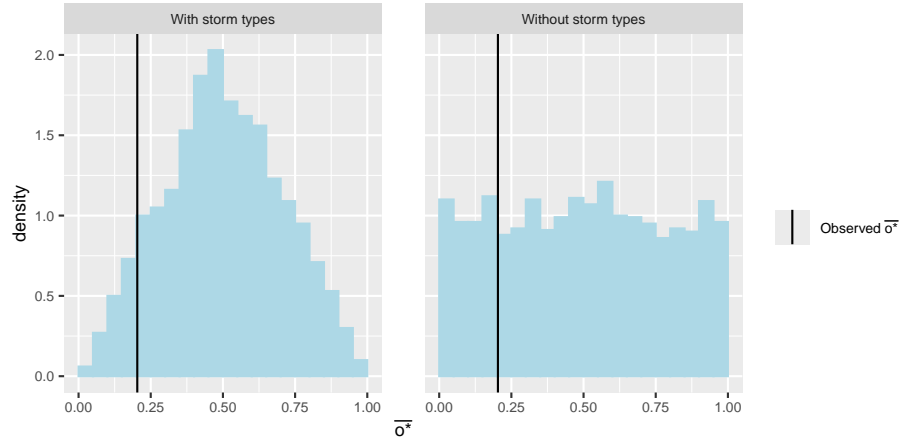

Figure S20: Prior predictive plot for the Atmospheric occurrence model for Tiree.

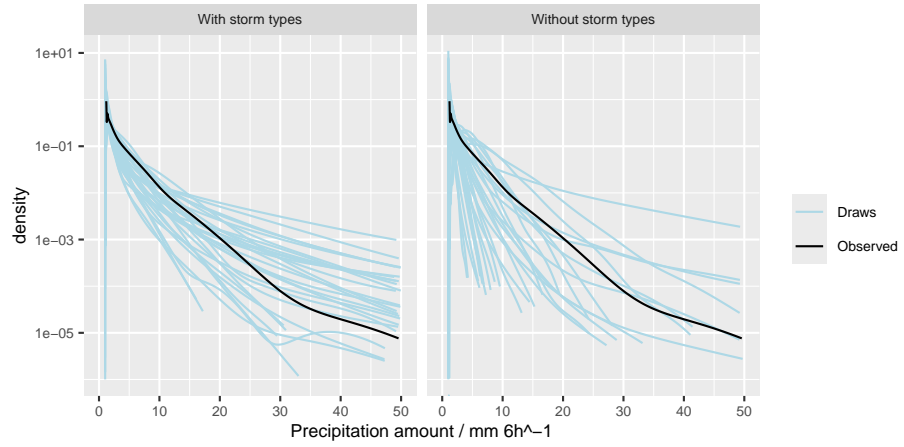

Figure S21: Prior predictive plot for the Atmospheric amounts model for Tiree.
